# Supplementary material
Source: publisher figshare collection journal article supplement (https://acs.figshare.com/ndownloader/files/7225565)
Supplement: Supplementary file 1 [file 7225565]

## **Supporting Information**

### **UV and IR Spectroscopy of Cryogenically Cooled, Lanthanide-Containing Ions in the Gas Phase**

**Yoshiya Inokuchi,<sup>a,\*</sup> Masashi Kaneko,<sup>a</sup> Takumi Honda,<sup>a</sup> Satoru Nakashima,<sup>a</sup>  
Takayuki Ebata,<sup>a</sup> and Thomas R. Rizzo<sup>b</sup>**

*Department of Chemistry, Graduate School of Science, Hiroshima University,  
Higashi-Hiroshima, Hiroshima 739-8526, Japan, and Laboratoire de Chimie Physique  
Moléculaire, École Polytechnique Fédérale de Lausanne, Lausanne CH-1015,  
Switzerland*

E-mail: y-inokuchi@hiroshima-u.ac.jp

Phone: +81(Japan)-82-424-7101

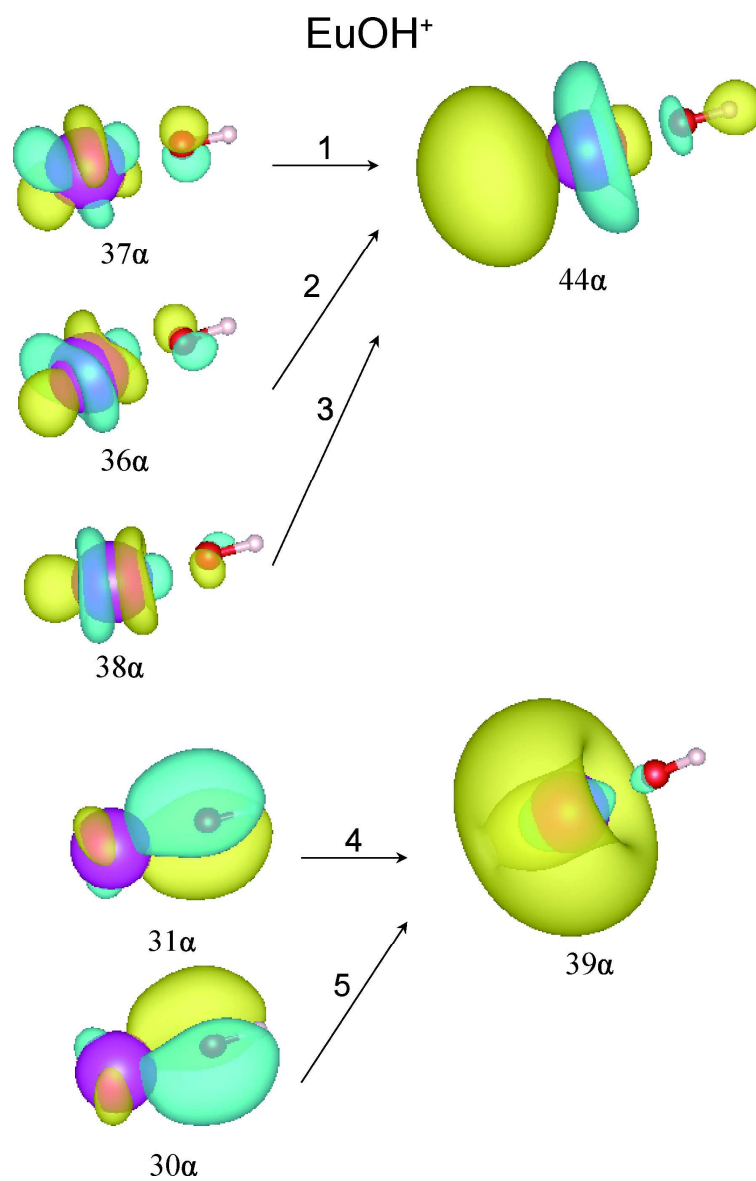

**Figure S1.** The MOs that contribute the most to the electronic transitions of the  $\text{EuOH}^+$  ion.

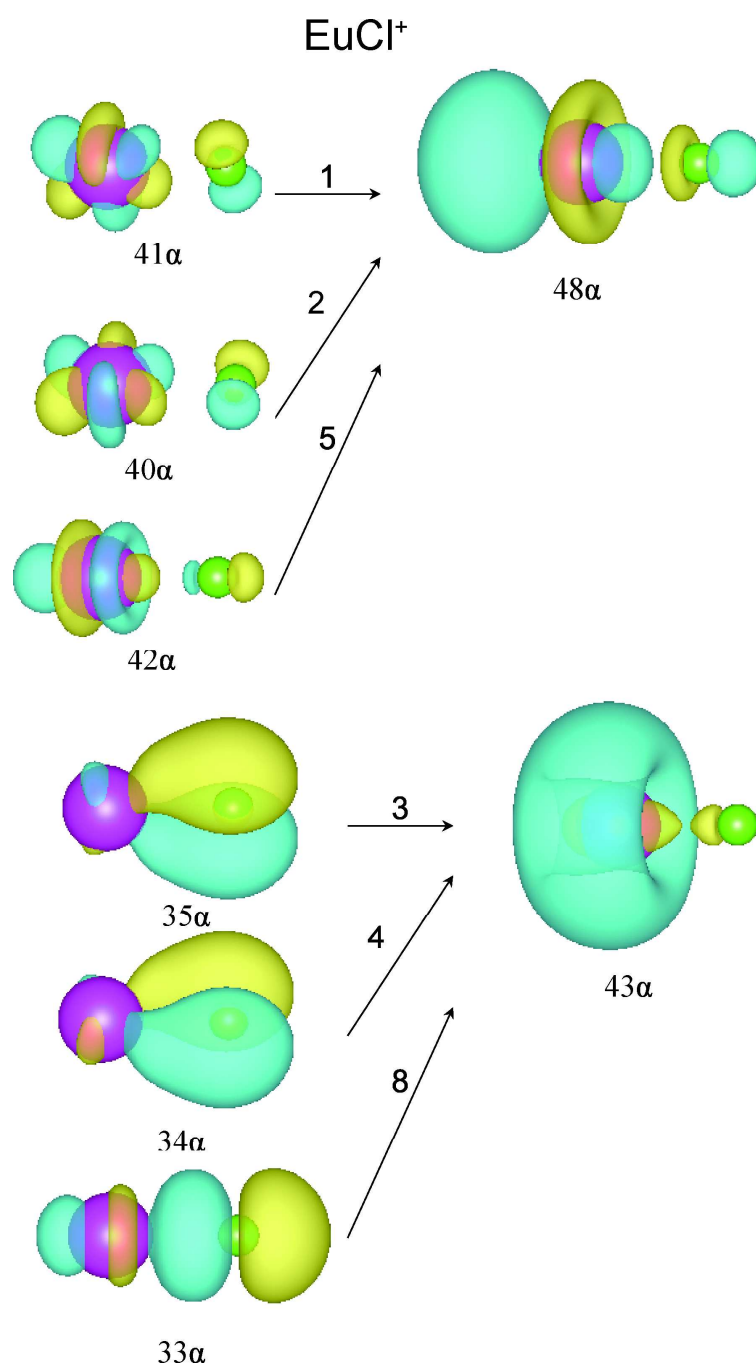

**Figure S2.** The MOs that contribute the most to the electronic transitions of the  $\text{EuCl}^+$  ion.

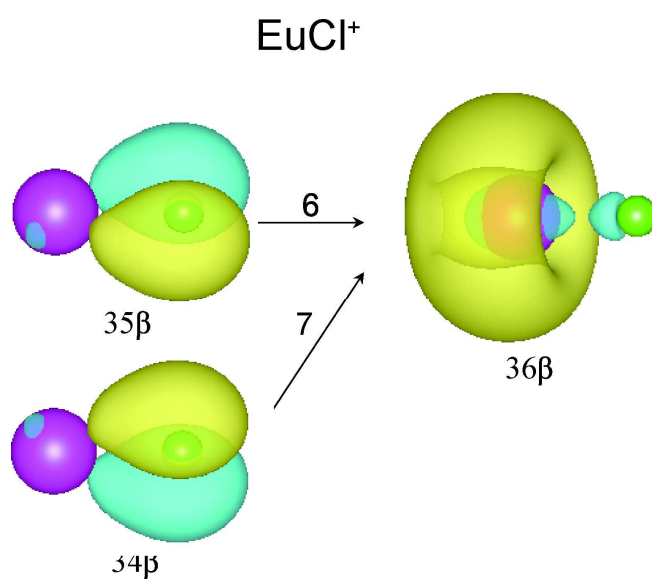

Figure S2. cont.

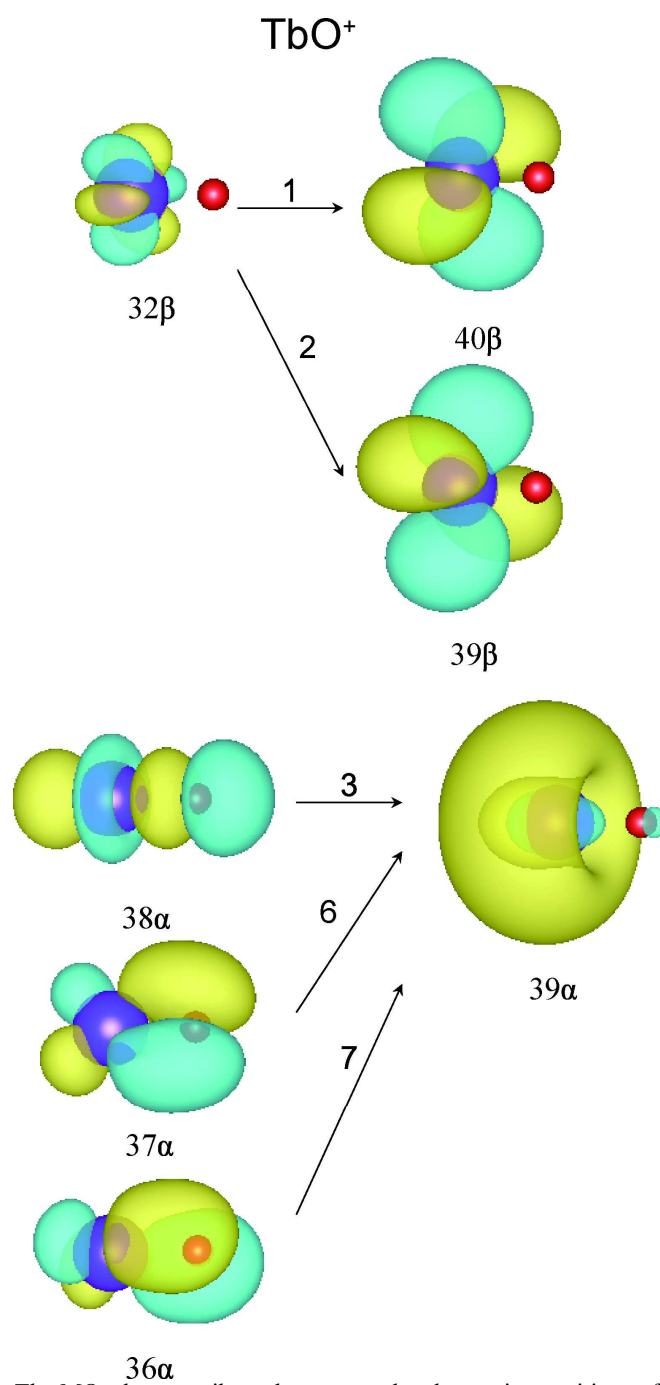

**Figure S3.** The MOs that contribute the most to the electronic transitions of the  $\text{TbO}^+$  ion.

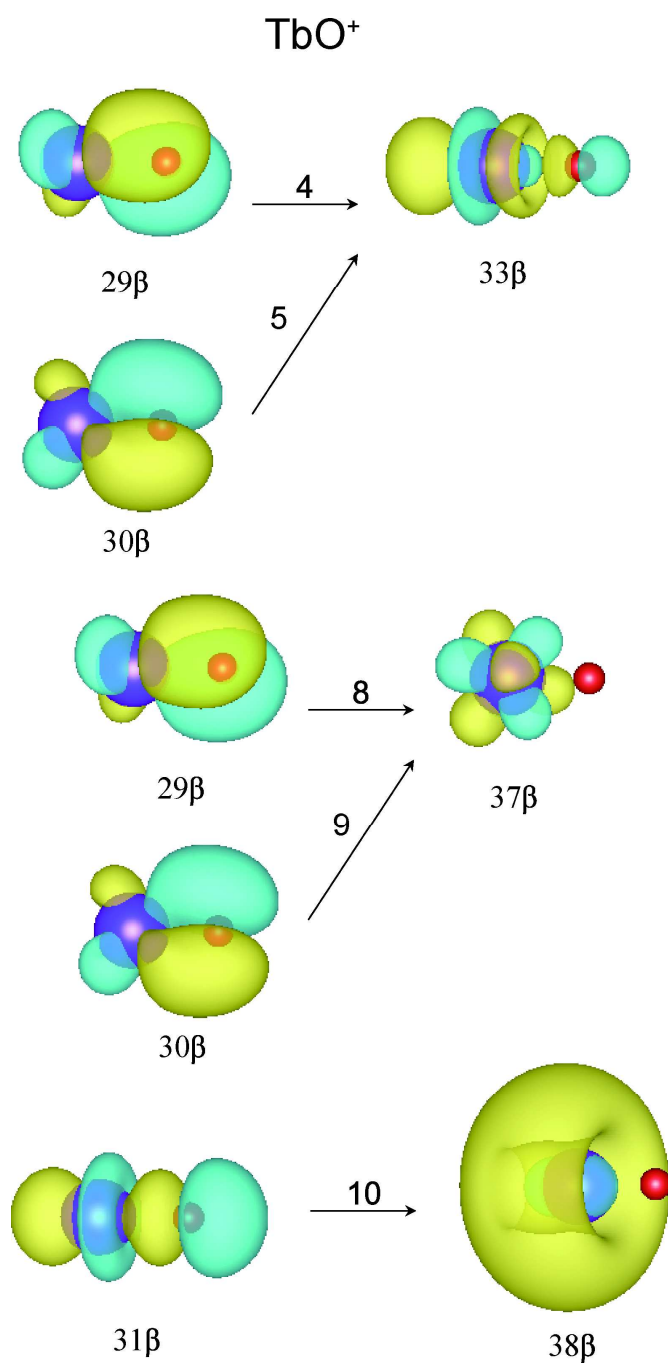

Figure S3. cont.
